# Supplementary material for: Development of Polymeric Membranes Based on Quaternized Polysulfones for AMFC Applications
Source: MDPI journal article supplement (doi:10.3390/polym12020283), 2020-02-01
Supplement: s1 [file s1]

## Supplementary Materials

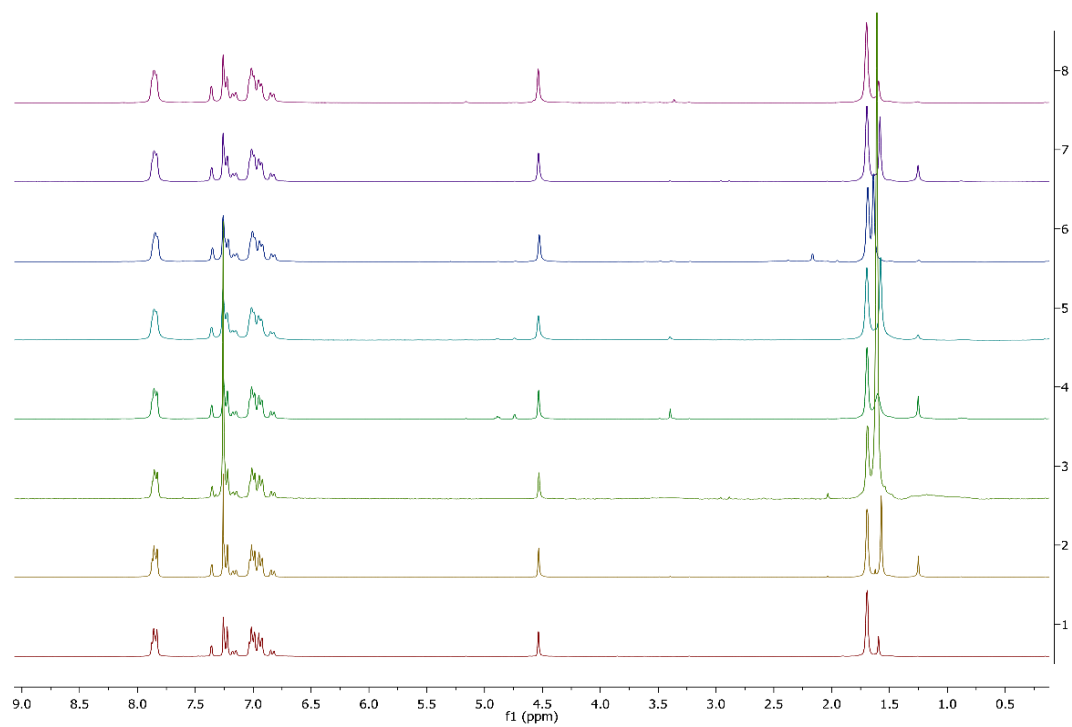

Figure S1 – Superimposed  $^1\text{H}$ -NMR of the kinetic study of chloromethylation of PSU from 65% to 100 %.

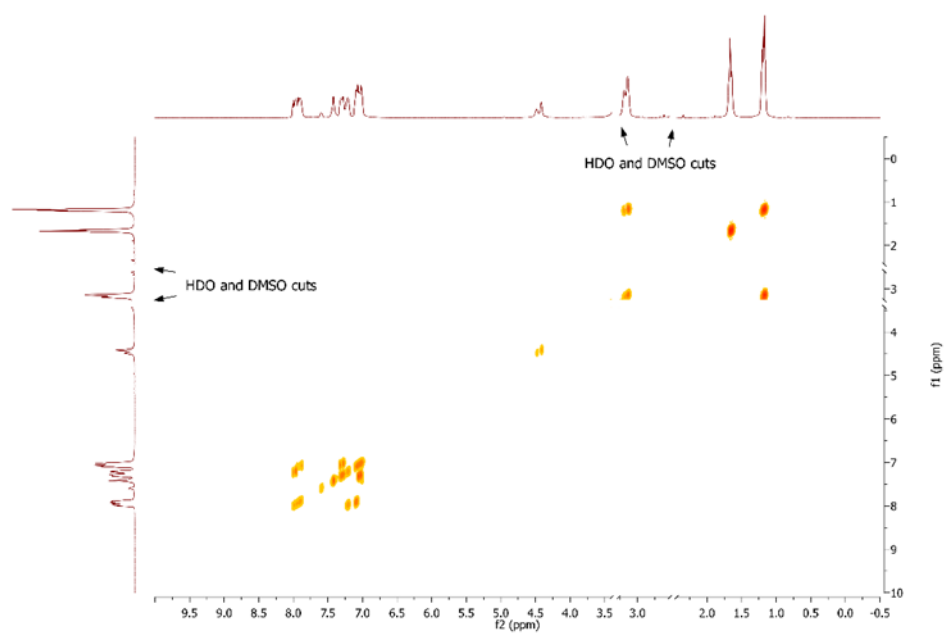

Figure SI2 COSY-PSU100QE

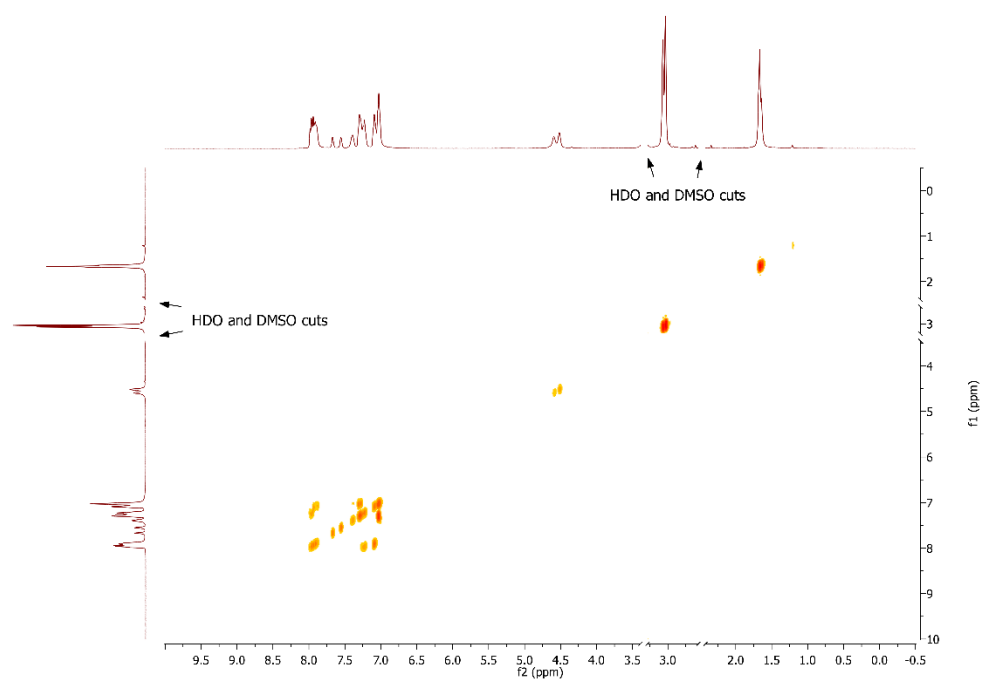

Figure SI3 2D-COSY-NMR PSU100QM

Table S1 – Water uptake, temperature of defunctionalization and decomposition of chloromethylated and quaternarized samples.

| SAMPLE     | Water loss, % | T <sub>fg</sub> , °C | T <sub>d</sub> , °C |
|------------|---------------|----------------------|---------------------|
| PSU60Cl    |               | 329                  | 393                 |
| PSU60QM-2  | 4.8           | 190                  | 350                 |
| PSU60QE-1  | 4.0           | 157                  | 350                 |
| PSU100Cl   |               | 153                  | 348                 |
| PSU100QM-1 | 8.5           | 151                  | 340                 |
| PSU100QE-3 | 8.2           | 149                  | 336                 |
| PSU150Cl   |               | 147                  | 314                 |
| PSU150QM-1 | 9.2           | 145                  | 308                 |
| PSU150QE-2 | 11.0          | 138                  | 291                 |
